# Supplementary material for: Spatio-Temporal Location Recommendation for Urban Facility Placement via Graph Convolutional and Recurrent Networks
Source: Springer Nature journal article supplement (doi:10.1007/s11390-023-2608-0), 2024-11-01
Supplement: 11390_2023_2608_MOESM1_ESM.pdf [file 11390_2023_2608_MOESM1_ESM.pdf]

Wang P, Lu JJ, Chen W *et al.* Spatio-temporal location recommendation for urban facility placement via graph convolutional and recurrent networks. JOURNAL OF COMPUTER SCIENCE AND TECHNOLOGY 39(6): 1419–1440 Nov. 2024. DOI: 10.1007/s11390-023-2608-0

# Spatio-Temporal Location Recommendation for Urban Facility Placement via Graph Convolutional and Recurrent Networks

Pu Wang (王璞), Jian-Jiang Lu (陆剑江), Wei Chen (陈伟),  
Peng-Peng Zhao (赵朋朋), Lei Zhao (赵雷)

# Research Objectives

- Location recommendation is crucial for the success of urban planning on facility placement.
- Customer effect, spatial correlation and temporal dependency are essential factors for location popularity.
- Deep Learning has been widely employed to model high-dimensional spatio-temporal data.

# Research Method

- Consider the spatio-temporal trajectories and online social services of dwellers.
- Introduce a novel semi-supervised spatio-temporal learning model STGCRN.
- Propose an attention based contextual graph convolution module and a popularity approximation block.

# Research Results

- STGCRN significantly outperforms all competitors under all conditions on Acc and RMSE.
- the Acc and RMSE of STGCRN are stably superior to that of all the baselines.
- STGCRN is quite effective for top-k candidate location recommendation for urban facility placement.

# Research Conclusions

- The experiments demonstrate the superiority of the proposed STGCRN compared with baselines.
- It can obtain the well-ranked candidate location lists for facility placement.
- In the future, we are of interest to explore the updates of candidate locations and dweller.
